# Supplementary material for: Convergent origin of the narrowly lanceolate leaf in the genus Aster—with special reference to an unexpected discovery of a new Aster species from East China
Source: PeerJ. 2019 Jan 25;7:e6288. doi: 10.7717/peerj.6288 (PMC6348959; doi:10.7717/peerj.6288)
Supplement: Table S1 [file peerj-07-6288-s001.xlsx]

## Sheet: Sheet1
		GenBank accessions
Taxon	Voucher or reference	ITS	ETS	trnL-F
Arctogeron gramineum (L.) DC.	Li et al. (2012)	JN315928	JN315952	JN315904
	WPL 0606014 (HNNU)
Aster ageratoides Turcz.	Li et al. (2012)	JN543781	JN543782	JN543783
	WPL 0112018 (HNNU)
Aster albescens (DC.) Wall. ex Hand.-Mazz.	Li et al. (2012)	JN543862	JN543863	JN543864
	WPL 0508123 (HNNU)
Aster alpinus L.	Li et al. (2012)	JN543817	JN543818	JN543819
	WPL 0607020 (HNNU)
Aster altaicus Willdenow	Li et al. (2012)	JN543709	JN543710	JN543711
	WPL 0506010 (HNNU)
Aster amellus L.	Li et al. (2012)	JN543742	JN543743	JN543744
	WPL 0408002 (HNNU)
Aster argyropholis Hand.-Mazz.	Li et al. (2012)	JN543793	JN543794	JN543795
	WPL 0409045 (HNNU)
Aster asteroides (DC.) Kuntze	Li et al. (2012)	JN543841	JN543842	JN543843
	WPL 0708112 (HNNU)
Aster auriculatus Franch.	Li et al. (2012)	JN543754	JN543755	JN543756
	WPL 0509059 (HNNU)
Aster baccharoides (Benth.) Steetz	Li et al. (2012)	JN543805	JN543806	JN543807
	WPL 0802001(HNNU)
Aster batangensis Bureau & Franch.	Li et al. (2012)	JN543859	JN543860	JN543861
	WPL 0606039 (HNNU)
Aster brachytrichus Franch.	Li et al. (2012)	JN543838	JN543839	JN543840
	WPL 0607075 (HNNU)
Aster crenatifolius Hand.-Mazz.	Li et al. (2012)	JN543712	JN543713	JN543714
	WPL 0409037 (HNNU)
Aster diplostephioides (DC.) C.B.Clarke	Li et al. (2012)	JN543847	JN543848	JN543849
	WPL 0507020 (HNNU)
Aster dolichophyllus Y. Ling	1, China, Guangxi, Huaping, T. G. Gao 3365 (PE) 2, China, Guangxi, Maoershan, G. J. Zhang GX621-1 (PE)* 3, China, Guangxi, Maoershan, G. J. Zhang GX621-2 (PE) 4, China, Guangxi, Maoershan, G. J. Zhang GX621-3 (PE) 5, China, Guangxi, Maoershan, T. G. Gao A30 (PE) 6, China, Guangxi, Maoershan, T. G. Gao 4596 (PE)	MH807104, MH807110, MH807095, MH807101, MH807098, MH807107	MH807103, MH807109, MH807094, MH807100, MH807097, MH807106	MH807105, MH807111, MH807096, MH807102, MH807099, MH807108
Aster dolichopodus Y. Ling	Zhang et al. (2015)	KP313688	KP313701	KP313714
	Z. X. Fu 70 (PE)
Aster falcifolius Hand.-Mazz.	Li et al. (2012)	JN543802	JN543803	JN543804
	WPL 0410050 (HNNU)
Aster fanjingshanicus Y. L. Chen & D. J. Liu	Li et al. (2012)	JN543829	JN543830	JN543831
	WPL 0606082 (HNNU)
Aster flaccidus Bunge	Li et al. (2012)	JN543844	JN543845	JN543846
	WPL 0607026(HNNU)
Aster fuscescens Bur. & Franch.	Li et al. (2012)	JN543751	JN543752	JN543753
	YGS1007021 (HNNU)
Aster handelii Onno	Li et al. (2012)	JN543820	JN543821	JN543822
	WPL 0708174 (HNNU)
Aster hersileoides C.K.Schneid.	Li et al. (2012)	JN543787	JN543788	JN543789
	WPL 0807002 (HNNU)
Aster heterolepis Hand.-Mazz.	Li et al. (2012)	JN543823	JN543824	JN543825
	WPL 0507004 (HNNU)
Aster homochlamydeus Hand.-Mazz.	Li et al. (2012)	JN543784	JN543785	JN543786
	WPL 0508004 (HNNU)
Aster incisus Fisch.	Li et al. (2012)	JN543721	JN543722	JN543723
	WPL 0609107 (HNNU)
Aster indicus L.	Li et al. (2012)	JN543715	JN543716	JN543717
	WPL 0806017 (HNNU)
Aster lavandulifolius Hand.-Mazz.	Li et al. (2012)	JN543796	JN543797	JN543798
	WPL 0708053 (HNNU)
Aster maackii Regel	Li et al. (2012)	JN543745	JN543746	JN543747
	WPL 0609043(HNNU)
Aster moupinensis (Franch.) Hand.-Mazz.	1, China, Chongqing, Beibei, G. J. Zhang 214	MH807113	MH807112	MH807114
Aster nitidus C. C. Chang	Li et al. (2012)	JN543790	JN543791	JN543792
	WPL 0505007 (HNNU)
Aster oreophilus Franch.	Li et al. (2012)	JN543826	JN543827	JN543828
	WPL 0509016 (HNNU)
Aster panduratus Nees ex Walp.	Li et al. (2012)	JN543757	JN543758	JN543759
	WPL 1012067 (HNNU)
Aster pekinensis (Hance) F. H. Chen	Li et al. (2012)	JN543718	JN543719	JN543720
	WPL 0609077 (HNNU)
Aster piccolii Hook.f.	Zhang et al. (2015)	KP313686	KP313699	KP313712
	Z. X. Fu 153 (PE)
Aster poliothamnus Diels	Li et al. (2012)	JN543763	JN543764	JN543765
	WPL 0506001 (HNNU)
Aster procerus Hemsl.	Zhang et al. (2015)	KP313683	KP313696	KP313709
	Z. X. Fu 693 (PE)
Aster pycnophyllus Franch. ex Diels	Li et al. (2012)	JN543799	JN543800	JN543801
	WPL 0509091 (HNNU)
Aster rugulosus Maxim.	1, England, Kew Gardens, T. G. Gao 7119	MH807130	**	**
Aster salwinensis Onno	Zhang et al. (2015)	KP313689	KP313702	KP313715
	Z. X. Fu 1620 (PE)
Aster savatieri Makino	Zhang et al. (2015)	KP313687	KP313700	KP313713
	A. Soejima 1 (PE)
Aster scaber Thunberg	Li et al. (2012)	JN315934	JN315958	JN315910
	WPL 0108025 (HNNU)
Aster setchuenensis Franch.	Li et al. (2012)	JN543850	JN543851	JN543852
	WPL 0508007 (HNNU)
Aster sikuensis W.W.Sm. & Farrer	Li et al. (2012)	JN543766	JN543767	JN543768
	WPL 0510025 (HNNU)
Aster sinoangustifolius Brouillet, Semple & Y. L. Chen	Zhang et al. (2015)	KP313684	KP313697	KP313710
	Z. X. Fu 189 (PE)
Aster smithianus Hand.-Mazz.	Zhang et al. (2015)	KP313685	KP313698	KP313711
	Z. X. Fu 143 (PE)
Aster souliei Franch.	Li et al. (2012)	JN543835	JN543836	JN543837
	WPL 0708084 (HNNU)
Aster taliangshanensis Y. Ling	Li et al. (2012)	JN543772	JN543773	JN543774
	WPL 0607056 (HNNU)
Aster tataricus L.f.	Li et al. (2012)	JN543748	JN543749	JN543750
	WPL 0108018 (HNNU)
Aster tianmenshanensis G. J. Zhang & T. G. Gao	Zhang et al. (2015)	KP313678, KP313677, KP313679	KP313691, KP313690, KP313692	KP313704, KP313703, KP313705
	1, C. F. Zhang 2720 (PE); 2, C. F. Zhang 2718 (PE); 3, C. F. Zhang 2726 (PE)
Aster tonglingensis G. J. Zhang & T. G. Gao	1, China, Zhejiang, Wencheng, Mt. Tongling H. H. Hu 331-1* 2, China, Zhejiang, Wencheng, Mt. Tongling H. H. Hu 331-2 3, China, Zhejiang, Wencheng, Mt. Tongling H. H. Hu 331-3 4, China, Zhejiang, Wencheng, Mt. Tongling H. H. Hu 331-4 5, China, Zhejiang, Wencheng, Mt. Tongling H. H. Hu 331-5	MH807116, MH807119, MH807122, MH807125, MH807128	MH807115, MH807118, MH807121, MH807124, MH807127	MH807117, MH807120, MH807123, MH807126, MH807129
Aster tongolensis Franch.	Li et al. (2012)	JN543832	JN543833	JN543834
	WPL 0708147 (HNNU)
Aster turbinatus S.Moore	Li et al. (2012)	JN543814	JN543815	JN543816
	WPL 0110029 (HNNU)
Aster verticillatus (Reinwardt) Brouillet, Semple & Y. L. Chen	Li et al. (2012) & Zhang et al. (2015)	KP313680, KP313681, JN543706	KP313693, KP313694, JN543707	KP313706, KP313707, JN543708
	1, T. Yang et al. 18266 (PE); 2,Tibet Exped. 1022 (PE); 3, WPL 0607065 (HNNU)
Aster vestitus Franch.	Li et al. (2012)	JN543769	JN543770	JN543771
	WPL 0509023 (HNNU)
Aster yunnanensis Franch.	Li et al. (2012)	JN543853	JN543854	JN543855
	WPL 0508089 (HNNU)
Asterothamnus centraliasiaticus Novopokr.	Li et al. (2012)	JN315930	JN315954	JN315906
	WPL 0607045 (HNNU)
Asterothamnus fruticosus (C.Winkl.) Novopokr.	Li et al. (2012)	JN315929	JN315953	JN315905
	WPL 0607005 (HNNU)
Bellis perennis L.	Li et al. (2012)	JN315918	JN315942	JN315894
	WPL 1003008 (HNNU)
Callistephus chinensis (L.) Nees	Li et al. (2012)	JN315931	JN315955	JN315907
	WPL 0108021 (HNNU)
Chrysanthemum indicum L.	Li et al. (2012)	JN315940	JN315964	JN315916
	WPL 1012002 (HNNU)
Conyza sumatrensis (S.F.Blake) Pruski & G.Sancho	Li et al. (2012)	JN315923	JN315947	JN315899
	WPL 1009002 (HNNU)
Crinitina linosyris (L.) Soják	Li et al. (2012)	JN315932	JN315956	JN315908
	WPL 0408001 (HNNU)
Dichrocephala auriculata (Thunb.) Druce	Li et al. (2012)	JN315919	JN315943	JN315895
	WPL 0708234 (HNNU)
Erigeron annuus (L.) Pers.	Li et al. (2012)	JN315924	JN315948	JN315900
	WPL 1010009 (HNNU)
Galatella dahurica DC.	Li et al. (2012)	JN315935	JN315959	JN315911
	WPL 0609047 (HNNU)
Grangea maderaspatana (L.) Poir.	Li et al. (2012)	JN315920	JN315944	JN315896
	WPL 0802034 (HNNU)
Myriactis nepalensis Less.	Li et al. (2012)	JN315921	JN315945	JN315897
	WPL 0509002 (HNNU)
Nannoglottis yunnanensis Hand.-Mazz.	Zhang et al. (2015)	KP313682	KP313695	KP313708
	T. G. Gao 4807 (PE)
Rhinactinidia eremophila (Bunge) Novopokr. ex Botsch.	Li et al. (2012)	JN543727	JN543728	JN543729
	WPL 0607036 (HNNU)
Rhinactinidia limoniifolia (Less.) Novopokr. ex Botsch.	Li et al. (2012)	JN543724	JN543725	JN543726
	WPL 0607012 (HNNU)
Sheareria nana S.Moore	Li et al. (2012)	JN543703	JN543704	JN543705
	WPL 0701001 (HNNU)
Solidago decurrens Lour.	Li et al. (2012)	JN204176	JN204177	JN204178
	WPL 0510116 (HNNU)
Symphyotrichum novi-belgii (L.) G.L.Nesom	Li et al. (2012)	JN315926	JN315950	JN315902
	WPL 0606002 (HNNU)
Tripolium pannonicum (Jacq.) Dobrocz.	Li et al. (2012)	JN315937	JN315961	JN315913
	WPL 0311001 (HNNU)
Turczaninowia fastigiata (Fisch.) DC.	Li et al. (2012)	JN543739	JN543740	JN543741
	WPL 0609030 (HNNU)
The samples newly sequenced in this study was in bold font.
*The samples used in micro-morphology observation
**no sequence
