# Supplementary material for: Convergent origin of the narrowly lanceolate leaf in the genus Aster—with special reference to an unexpected discovery of a new Aster species from East China
Source: PeerJ. 2019 Jan 25;7:e6288. doi: 10.7717/peerj.6288 (PMC6348959; doi:10.7717/peerj.6288)
Supplement: Table S2 [file peerj-07-6288-s002.xlsx]

## Sheet: Sheet1
species name	habitat		individual No. 1		individual No. 2		individual No. 3		individual No. 4		individual No. 5		individual No. 6		individual No. 7		individual No. 8		individual No. 9		individual No. 10		covariance	Pearson correlation coefficient
			length （mm）	width (mm)	length （mm）	width (mm)	length （mm）	width (mm)	length （mm）	width (mm)	length （mm）	width (mm)	length （mm）	width (mm)	length （mm）	width (mm)	length （mm）	width (mm)	length （mm）	width (mm)	length （mm）	width (mm)
Aster souliei	non-riparian habitat	leaf No. 1	43	11	36	10	47	10	58	10	48	6	32	8	32	9	32	6	32	8	34	5	11.8563	0.456676
		leaf No. 2	32	6	35	8	48	7	47	6	57	11	20	8	29	4	48	5	23	5	50	7
		leaf No. 3	30	5	18	7	28	4	35	5	60	10	30	9	30	5	38	11	21	4	38	5
Aster vestitus	non-riparian habitat	leaf No. 1	57	14	46	10	47	12	26	7	52	14	40	11	66	13	58	15	60	12	53	10	21.1103	0.779682
		leaf No. 2	68	14	47	10	48	12	27	6	53	15	42	11	71	13	53	13	55	13	52	10
		leaf No. 3	60	14	45	10	47	14	29	7	50	12	45	13	62	12	40	9	63	14	44	9
Aster moupinensis	narrowly riparian habitat	leaf No. 1	35	3	42	2	28	2	25	2	75	3	23	1	34	3	85	2	83	3	65	2	6.73563	0.48484
		leaf No. 2	34	3	48	3	32	2	25	2	73	3	22	1	38	3	55	2	66	2	90	3
		leaf No. 3	43	2	43	2	30	2	25	2	90	3	26	2	37	3	68	3	78	3	62	2
Aster smithianus	non-riparian habitat	leaf No. 1	63	11	70	17	108	21	58	13	46	10	65	13	53	15	75	17	50	13	55	12	40.4874	0.806669
		leaf No. 2	53	10	90	18	97	18	57	13	47	10	55	11	49	15	55	14	48	12	54	12
		leaf No. 3	57	11	89	19	88	14	60	15	44	10	62	11	43	14	61	13	44	10	53	12
Aster heterolepis	non-riparian habitat	leaf No. 1	43	6	34	6	65	10	46	6													12.2727	0.880343
		leaf No. 2	32	6	40	6	52	7	43	6
		leaf No. 3	45	6	28	5			35	5
Aster altaicus	non-riparian habitat	leaf No. 1	31	4	25	3	33	6	25	3	36	5	30	4	34	4	11	3	30	4	19	4	5.83793	0.728925
		leaf No. 2	30	5	32	4	36	5	24	3	44	5	30	5	27	3	13	3	28	3	17	4
		leaf No. 3	32	5	25	4	37	5	25	3	40	6	34	5	22	3	14	2	29	4	18	4
Aster crenatifolius	non-riparian habitat	leaf No. 1	21	5	50	9	41	8	25	5	32	11	27	8	43	11	36	6	46	9	47	10	30.0138	0.790244
		leaf No. 2	20	4	52	8	42	8	28	5	23	9	24	6	44	12	75	18	40	8	41	9
		leaf No. 3	20	4	48	7	61	13	35	6	23	8	28	6	41	10	34	7	44	10	37	6
Aster tongolensis	non-riparian habitat	leaf No. 1	35	6	45	6	49	9	44	7	70	7	33	6	50	8	40	5	58	9	72	9	11.1931	0.584324
		leaf No. 2	33	6	25	4	33	5	29	5	60	5	33	6	42	6	38	4	52	8	51	7
		leaf No. 3	29	6	58	8	43	8	28	6	55	5	30	6	52	8	52	7	51	10	44	6
Aster oreophilus	non-riparian habitat	leaf No. 1	45	11	50	6	59	10	58	6	35	8	23	5	50	11	45	11	53	11	32	6	18.5931	0.659819
		leaf No. 2	40	9	44	5	45	9	38	5	35	8	33	6	44	10	42	9	63	13	36	6
		leaf No. 3	31	7	37	4	43	9	38	5	30	6	34	6	31	8	49	10	75	12	34	5
Aster ageratoides	non-riparian habitat	leaf No. 1	135	32	110	32	128	37	62	22	48	16	76	32	84	21	65	25	40	16	63	21	146.031	0.827622
		leaf No. 2	83	23	94	24	125	36	65	24	55	14	68	27	81	22	68	25	46	18	50	18
		leaf No. 3	135	28	84	21	116	33	60	22	50	14	64	26	88	25	70	26	41	16	55	21
Aster homochlamydeus	non-riparian habitat	leaf No. 1	50	25	95	28	70	20	53	22	72	25	115	41	65	20	70	20	107	26	110	33	106.871	0.713053
		leaf No. 2	60	30	90	27	67	24	70	24	64	26	105	34	58	22	70	18	115	24	112	40
		leaf No. 3	50	23	80	23	60	20	60	30	60	20	100	36	52	18	60	17	110	30	103	38
Aster handelii	non-riparian habitat	leaf No. 1	38	7	21	5	33	6	41	6	45	10	45	6	23	6	30	6	42	7	24	7	4.04023	0.480643
		leaf No. 2	34	7	28	6	32	5	31	6	38	8	45	5	23	6	33	7	35	6	25	5
		leaf No. 3	28	5	28	6	40	8	34	6	33	7	39	5	21	5	25	5	32	6	25	5
Aster fanjingshanensis	non-riparian habitat	leaf No. 1	14	4	15	5	18	6															1.88889	0.622989
		leaf No. 2	13	4	14	5	17	4
		leaf No. 3	14	3	9	4	19	6
Aster indicus	non-riparian habitat	leaf No. 1	34	10	50	15	41	11	32	10	54	12	44	13	44	13	32	9	34	11	46	13	13.7448	0.801067
		leaf No. 2	34	10	55	16	39	10	36	11	52	11	50	16	41	13	36	10	36	12	43	11
		leaf No. 3	29	8	47	13	32	9	28	7	37	9	45	15	37	11	30	9	37	13	41	11
Aster pekingensis	non-riparian habitat	leaf No. 1	30	6	48	8	28	6	32	7	23	4	26	4	35	5	35	7	38	7	39	8	9.36552	0.790164
		leaf No. 2	24	5	52	8	30	6	34	7	20	3	29	4	34	5	32	6	42	7	38	8
		leaf No. 3	20	4	46	6	29	5	32	7	22	4	27	4	34	5	31	5	40	7	37	8
Aster incisus	non-riparian habitat	leaf No. 1	55	17	52	10	70	8	80	15	80	15	64	12	62	11	64	12	60	10	51	11	6.5977	0.27504
		leaf No. 2	52	15	42	9	59	13	63	13	75	12	60	11	65	14	70	13	51	12	60	13
		leaf No. 3	44	16	44	8	60	14	65	11	87	14	65	13	63	12	54	9	62	10	61	12
Sheareria nana	narrowly riparian habitat	leaf No. 1	26	3	21	3	15	3	25	2	26	3	14	3									2.34167	0.550958
		leaf No. 2	26	3	20	2	13	2	13	1	14	2	22	3
		leaf No. 3	29	4			11	2			14	3	18	3
Aster tianmenshanensis	non-riparian habitat	leaf No. 1	32	8	38	9	40	5															4.625	0.390971
		leaf No. 2	16	5	25	7	26	7
		leaf No. 3	27	6	21	7	34	9
Aster verticillatus	non-riparian habitat	leaf No. 1	43	10	56	17	76	18	68	17	34	13	54	15	71	16	53	7	65	13	60	13	31.9598	0.700661
		leaf No. 2	29	6	38	14	57	15	70	16	37	12	53	13	79	16	40	8	53	12	61	13
		leaf No. 3	50	13	41	12	66	19	65	12	31	12	51	14	82	17	40	10	43	10	49	12
Aster baccharoides	non-riparian habitat	leaf No. 1	35	8	46	13	37	10	27	7	40	10	35	5	32	8	42	8	35	7	37	10	8.01724	0.791883
		leaf No. 2	30	7	39	10	43	11	32	8	36	10	29	5	40	10	36	8	31	7	40	10
		leaf No. 3	34	8	40	12	36	10	24	6	34	9	30	6	42	11	34	7	33	6	38	8
Aster turbinatus	non-riparian habitat	leaf No. 1	90	25	70	21	88	20	77	22	85	25	88	26	86	15	64	16	60	25	46	21	32.5172	0.489197
		leaf No. 2	86	28	62	21	84	24	73	20	67	20	89	27	77	15	62	15	53	23	38	18
		leaf No. 3	85	27	56	18	73	23	59	19	58	19	84	28	71	15	55	15	54	22	34	17
Aster savatieri	non-riparian habitat	leaf No. 1	108	26	93	30	55	21	58	21													51.7803	0.666377
		leaf No. 2	91	21	82	32	59	20	56	20
		leaf No. 3	84	24	82	25	55	20	54	21
Turczaninowia fastigiatus	broad riparian habitat	leaf No. 1	39	3	49	9	75	10	90	5	38	5	33	7	46	4	40	4	75	5	37	4	16.2783	0.403997
		leaf No. 2	40	4	53	9	90	11	75	5	32	5	34	7	50	3	38	4	60	6	34	4
		leaf No. 3	46	4	65	10	52	9	52	5	35	5	34	7			65	5	70	5	31	4
Aster procerus	non-riparian habitat	leaf No. 1	80	28	60	31	70	27	86	35	70	25	80	35									31.3529	0.579963
		leaf No. 2	93	27	52	26	54	23	70	30	67	24	85	35
		leaf No. 3	65	23	50	21	75	22	62	26	64	23	65	28
Aster amellus	non-riparian habitat	leaf No. 1	71	17	65	17	54	14	55	15	56	17	36	10	40	9	51	13	64	16	48	10	31.0563	0.80975
		leaf No. 2	58	15	61	14	67	19	51	12	57	15	38	11	30	7	56	14	58	14	40	9
		leaf No. 3	57	15	68	19	45	19	40	9	48	11	51	16	40	8	40	11	72	15	44	10
Aster alpinus	non-riparian habitat	leaf No. 1	39	5	85	11	47	6	45	6	53	6	65	9	73	9	45	9	40	7	43	7	21.9034	0.711753
		leaf No. 2	34	4	65	9	53	7	38	6	48	5	65	10	65	7	39	8	32	8	25	6
		leaf No. 3	29	4	55	10	40	6	29	5	40	4	78	10	42	5	33	8	39	5	50	9
Rhinactinidia limoniifoilia	non-riparian habitat	leaf No. 1	35	8	38	8	28	5	37	7	15	7	25	8	15	3	55	10	20	5	32	6	12.3494	0.725958
		leaf No. 2	38	7	35	8	25	4	40	8	12	6	27	9	32	9	35	8	18	4	23	6
		leaf No. 3	40	8	39	7	23	6	35	8	21	6	19	5	33	6	42	9	23	6	18	5
Rhinactinidia eremophila	non-riparian habitat	leaf No. 1	20	3																			6.33333	0.706129
		leaf No. 2	24	5
		leaf No. 3	35	5
Aster piccolii	non-riparian habitat	leaf No. 1	62	15	70	17	72	14	56	12	72	16											6.03333	0.35142
		leaf No. 2	62	16	50	16	47	14	64	11	61	14
		leaf No. 3	65	16	71	18	65	14	58	10	71	15
Aster maackii	non-riparian habitat	leaf No. 1	45	7	73	11	62	9	85	16	43	7	68	10	48	7	83	15	45	6	95	11	51.8621	0.885414
		leaf No. 2	43	8	72	10	60	9	88	15	44	6	65	11	48	7	82	13	40	6	92	13
		leaf No. 3	42	7	65	9	48	9	70	14	42	6	77	11	46	7	81	13	43	5	95	12
Aster taliangshanensis	non-riparian habitat	leaf No. 1	64	18	68	23	70	19	61	16	57	15	51	12	89	20	71	26	100	22	98	21	34.7322	0.480399
		leaf No. 2	58	18	63	21	69	21	53	19	64	14	48	14	87	20	66	28	101	23	103	19
		leaf No. 3	47	15	60	23	64	18	55	15	55	14	43	15	73	16	64	24	98	25	93	17
Aster tataricus	non-riparian habitat	leaf No. 1	120	32	80	12	118	28	110	27	155	30	122	22	128	28	92	17	81	24	83	24	84.3506	0.627521
		leaf No. 2	118	29	68	11	115	25	100	20	135	22	119	20	115	27	120	18	79	20	90	28
		leaf No. 3	123	22	70	11	113	19	84	14	93	16	117	20	108	22	114	16	74	14	57	17
Aster tonglingensis	narrowly riparian habitat	leaf No. 1	80	7	88	8	120	9															29.6667	0.934267
		leaf No. 2	66	6	135	10	80	6
		leaf No. 3	90	8	93	7	73	6
Aster sinoangustifolius	broad riparian habitat	leaf No. 1	98	9	60	8	53	5	31	5	86	12	71	9	71	10	100	13					49.692	0.828326
		leaf No. 2	104	10	57	9	55	7	44	6	102	12	56	8	68	9	100	11
		leaf No. 3	94	9	42	7	39	6	36	6	92	14	40	8	63	10	93	11
Aster poliothamnus	non-riparian habitat	leaf No. 1	23	6	18	4	26	4	27	5	15	4	18	5	25	4	22	4	25	5	30	5	1.66667	0.301914
		leaf No. 2	16	5	17	4	32	4	20	3	14	3	17	3	23	4	19	4	30	5	25	4
		leaf No. 3	20	5	20	4	26	4	18	3	16	4	18	4	25	9	20	4	26	4	28	4
Aster sikuensis	non-riparian habitat	leaf No. 1	22	6	21	6	27	10	29	10	19	7											3.11905	0.548726
		leaf No. 2	25	8	22	7	25	13	25	9	21	8
		leaf No. 3	22	7	21	6	20	8	23	8	18	9
Asterothamnus fruticosus	non-riparian habitat	leaf No. 1	10	2	26	4	15	3															3.97222	0.795206
		leaf No. 2	11	2	27	3	15	3
		leaf No. 3	7	2	16	2	12	2
Asterothamnus centraliasiaticus	non-riparian habitat	leaf No. 1	10	3	11	2	10	2	11	2	15	2	11	2	8	3							0.8	0.432109
		leaf No. 2	11	3	11	2	16	2	14	2	20	3	18	3	10	2
		leaf No. 3	10	2	8	2	10	2	11	2	9	1	18	3	10	2
Arctogeron gramineaum	non-riparian habitat	leaf No. 1	54	1	66	1	80	1	51	1	41	1	34	1	74	1							0	N/A
		leaf No. 2	71	1	55	1	58	1	44	1	55	1	22	1	74	1
		leaf No. 3	63	1	53	1	59	1	58	1	37	1	32	1	58	1
Aster falcifolius	non-riparian habitat	leaf No. 1	45	8	57	17	67	13	45	13	55	14	60	10	67	20	60	10	65	16	50	14	12.7291	0.400691
		leaf No. 2	50	9	59	18	75	14	49	12	55	15	65	10	60	18	45	10	68	16	47	10
		leaf No. 3	45	9	56	18	70	14	36	11	54	14	63	9	58	19	60	10	60	16
Aster scaber	non-riparian habitat	leaf No. 1	40	14	100	40	62	28	78	40	55	23	90	35	80	40	80	46	68	38	73	34	120.685	0.861781
		leaf No. 2	53	20	77	34	63	30	68	36	46	23	76	35	72	28	98	35	52	24	68	25
		leaf No. 3	60	28	42	22	60	23	60	28	41	18	67	30	100	47	80	31	43	19	60	28
Aster rugulosus	broad riparian habitat	leaf No. 1	186	20	95	8	107	10	89	9	61	11	89	9	130	9	93	9	58	8	98	7	49.408	0.640841
		leaf No. 2	145	13	87	7	100	9	90	10	93	13	65	8	117	8	120	10	60	7	85	6
		leaf No. 3	111	12	77	7	114	11	76	9	75	13	95	10	100	8	110	8	67	7	82	5
Aster dolichopodus	non-riparian habitat	leaf No. 1	47	9	64	11	49	11	75	11	56	8	49	7	60	14	90	16	62	13	86	16	31.3218	0.772539
		leaf No. 2	50	8	70	10	53	10	75	10	52	9	51	8	59	13	75	14	64	13	83	15
		leaf No. 3	50	9	65	11	53	10	79	10	52	8	59	8	80	17	95	16	66	14	76	15
Aster hersileoides	non-riparian habitat	leaf No. 1	50	10	43	8	29	5															15.0417	0.92892
		leaf No. 2	38	9	40	9	26	5
		leaf No. 3	42	9	42	9	30	5
Aster nitidus	non-riparian habitat	leaf No. 1	75	19	51	14	48	10	57	16	50	11	50	11	65	14	72	15	55	11	46	11	21.4138	0.83733
		leaf No. 2	61	15	55	15	49	10	65	15	45	11	53	11	68	17	75	16	47	11	47	11
		leaf No. 3	64	17	52	14	50	11	63	16	62	12	48	10	48	11	67	14	45	11	38	10
Aster dolichophyllus	narrowly riparian habitat	leaf No. 1	108	8	102	9	135	6															2.16667	0.0782756
		leaf No. 2	92	9	95	8	90	5
		leaf No. 3	95	8	83	8	130	10
